# Supplementary material
Source: publisher site journal article supplement (https://static.cambridge.org/content/id/urn:cambridge.org:id:article:S0022050717000821/resource/name/S0022050717000821_supp1.pdf)
Supplement: Supplementary file 1 [file S0022050717000821_supp1.pdf]

# Appendix for “Publishing Nations: Technology Acquisition and Language Standardization for European Ethnic Groups”

July 18, 2017

## Contents

|       |                                                                                 |     |
|-------|---------------------------------------------------------------------------------|-----|
| 1     | List of 171 Ethnic Groups in the Data Set                                       | A2  |
| 2     | List of 47 European States in the Data Set                                      | A7  |
| 3     | Regression Tables                                                               | A9  |
| 3.1   | Cox proportional hazards and logistic regression models used in paper . . . . . | A9  |
| 3.2   | Robustness checks I: state as the unit of analysis . . . . .                    | A11 |
| 3.2.1 | State-only sample . . . . .                                                     | A11 |
| 3.2.2 | Stateless ethnic groups-only sample . . . . .                                   | A13 |
| 3.3   | Robustness checks II: The role of human capital . . . . .                       | A15 |
| 3.4   | Instrumental variables (IV) approach: Distance from Mainz as IV . . . . .       | A17 |

# 1 List of 171 Ethnic Groups in the Data Set

**Table A1**

|    | name            | homeland city                                  | printing press | dictionary |
|----|-----------------|------------------------------------------------|----------------|------------|
| 1  | Abaza           | Adyge-Khabl                                    |                |            |
| 2  | Abkhaz          | Sukhumi                                        |                | 1986       |
| 3  | Adyge           | Maykop                                         |                |            |
| 4  | Aguls           | Tpig, Dagestan                                 |                |            |
| 5  | Ajars           | Batumi                                         |                |            |
| 6  | Akhvakh         | Akhvakhsky district, Dagestan                  |                |            |
| 7  | Alanders        | Mariehamn                                      |                |            |
| 8  | Albanians       | Tirana                                         | 1555           | 1980       |
| 9  | Alsations       | Strasbourg                                     | 1460           | 1899       |
| 10 | Andalusians     | Seville                                        | 1477           | 1941       |
| 11 | Andis           | Khasavyurt, Dagestan                           |                |            |
| 12 | Andorrans       | Andorra La Vella                               |                |            |
| 13 | Archis          | Arsha-Makhi, Dagestan                          |                | 1977       |
| 14 | Armenians       | Yerevan                                        | 1512           | 1971       |
| 15 | Aromanians      | Trikala                                        |                | 1963       |
| 16 | Austrians       | Vienna                                         | 1461           | 1963       |
| 17 | Avars           | Kunzakh, Khunzakhsky district, Dagestan        |                |            |
| 18 | Azeris          | Baku                                           | 1870           | 1966       |
| 19 | Azoreans        | Ponta Delgada                                  |                |            |
| 20 | Bagulals        | Tsumadinsky district                           |                |            |
| 21 | Balkars         | Karachayevsky district                         |                | 1996       |
| 22 | Bashkorts       | Ufa                                            |                | 1993       |
| 23 | Basques         | Vitoria                                        | 1545           | 1989       |
| 24 | Bats            | Tusheti                                        |                | 2003       |
| 25 | Bavarians       | Munich                                         | 1482           | 1827       |
| 26 | Belarussians    | Minsk                                          | 1520           | 1977       |
| 27 | Bezhetas        | Bezhta village, Tsuntinsky district, Dagestan  |                |            |
| 28 | Bosnians        | Sarajevo                                       | 1866           | 1992       |
| 29 | Botligs         | Botlikh village, Botlikhsky district, Dagestan |                |            |
| 30 | Bretons         | Rennes                                         | 1485           | 1958       |
| 31 | Budugs          | Budug                                          |                |            |
| 32 | Bulgarians      | Sofia                                          | 1566           | 1895       |
| 33 | Burgundians     | Dijon                                          | 1491           |            |
| 34 | Canarians       | Santa Cruz de Tenerife                         |                | 1995       |
| 35 | Carpatho-Rusyns | Uzhgorod                                       | 1572           |            |

*continued on next page*

*continued from previous page*

|    | name           | homeland city                                   | printing press | dictionary |
|----|----------------|-------------------------------------------------|----------------|------------|
| 36 | Catalans       | Barcelona                                       | 1475           | 1930       |
| 37 | Chamalals      | Agvali village, Tsumadinsky district, Dagestan  |                |            |
| 38 | Chavash        | Cheboksary                                      |                | 1928       |
| 39 | Chechens       | Grozny                                          |                | 1961       |
| 40 | Cherkess       | Cherkessk                                       |                | 1956       |
| 41 | Cornish        | Truno                                           | 1700           |            |
| 42 | Corsicans      | Ajaccio                                         | 1769           |            |
| 43 | Crimean Tatars | Bakhchysarai                                    |                |            |
| 44 | Croats         | Zagreb                                          | 1483           | 1901       |
| 45 | Csangos        | Miercurea Ciuc                                  | 1533           | 1936       |
| 46 | Czechs         | Prague                                          | 1487           | 1935       |
| 47 | Danes          | Copenhagen                                      | 1490           | 1918       |
| 48 | Dargins        | Makhachkala, Dagestan                           |                | 2005       |
| 49 | Didos          | Kidero village, Tsuntinsky district, Dagestan   |                |            |
| 50 | Don Cossacks   | Novocherkassk                                   |                | 1975       |
| 51 | Dutch          | Amsterdam                                       | 1477           | 1864       |
| 52 | English        | London                                          | 1476           | 1755       |
| 53 | Estonians      | Tallinn                                         | 1535           | 1918       |
| 54 | Faroese        | Torshavn                                        |                | 1966       |
| 55 | Finns          | Helsinki                                        | 1542           | 1953       |
| 56 | Flemish        | Brussels                                        | 1475           | 1873       |
| 57 | French         | Paris                                           | 1470           | 1858       |
| 58 | Frisians       | Leeuwarden                                      | 1630           | 1874       |
| 59 | Friulis        | Udine                                           | 1484           | 1985       |
| 60 | Gagauz         | Comrat                                          |                |            |
| 61 | Galicians      | Santiago de Compostela                          | 1483           | 1986       |
| 62 | Georgians      | Tbilisi                                         | 1709           | 1884       |
| 63 | Germans        | Berlin                                          | 1540           | 1852       |
| 64 | Gibraltarians  | Gibraltar                                       | 1878           |            |
| 65 | Ginugs         | Tsuntinsky district, Dagestan                   |                |            |
| 66 | Godoberis      | Godoberi village, Botlikhsky district, Dagestan |                |            |
| 67 | Greeks         | Athens                                          | 1759           | 1936       |
| 68 | Guernseians    | St. Peter Port                                  |                |            |
| 69 | Hungarians     | Budapest                                        | 1473           | 1890       |
| 70 | Icelanders     | Reykjavik                                       | 1540           | 1912       |
| 71 | Ingrians       | Saint Petersburg                                | 1711           | 1953       |
| 72 | Ingush         | Nazran                                          |                |            |
| 73 | Irish          | Dublin                                          | 1550           | 1913       |
| 74 | Istrians       | Pulj                                            | 1905           | 1979       |
| 75 | Italians       | Rome                                            | 1467           | 1861       |

*continued on next page*

*continued from previous page*

|     | name              | homeland city                                    | printing press | dictionary |
|-----|-------------------|--------------------------------------------------|----------------|------------|
| 76  | Jerseyites        | St. Helier                                       |                |            |
| 77  | Kabards           | Nalchik                                          |                |            |
| 78  | Kalmyks           | Elista                                           |                |            |
| 79  | Karachais         | Mikoyan Shakhar                                  |                | 1996       |
| 80  | Karatas           | Karata village, Akhvakhsky district, Dagestan    |                |            |
| 81  | Karels            | Petrozavodsk                                     | 1930           | 1968       |
| 82  | Kashubians        | Gdansk                                           | 1499           | 1994       |
| 83  | Khinalugs         | Quba                                             |                |            |
| 84  | Khunzuls          | Nakhada village, Tsuntinsky district, Dagestan   |                |            |
| 85  | Khwarshia         | Khvarshi village, Tsumadinsky district, Dagestan |                |            |
| 86  | Kists             | Kakheti                                          |                |            |
| 87  | Komis             | Syktyvkar                                        |                | 1959       |
| 88  | Kosovars          | Pristina                                         |                |            |
| 89  | Kryts             | Jek                                              |                |            |
| 90  | Kuban Cossacks    | Krasnodar                                        |                |            |
| 91  | Kумыks            | Buynaksk, Dagestan                               |                |            |
| 92  | Ladins            | Belluno                                          | 1475           |            |
| 93  | Laks              | Vachi, Dagestan                                  |                |            |
| 94  | Latvians          | Riga                                             | 1525           | 1972       |
| 95  | Lezgins           | Mamash, Dagestan                                 |                |            |
| 96  | Liechtensteiners  | Vaduz                                            |                |            |
| 97  | Ligurians         | Genoa                                            | 1472           | 1985       |
| 98  | Lithuanians       | Vilnius                                          | 1525           | 1956       |
| 99  | Livonians         | Ventspils                                        | 1542           | 1938       |
| 100 | Lombards          | Milan                                            | 1471           | 1835       |
| 101 | Luxembourgers     | Luxembourg City                                  | 1598           | 1950       |
| 102 | Macedonians       | Skopje                                           | 1840           | 1961       |
| 103 | Madeirans         | Funchal                                          |                |            |
| 104 | Maltese           | Valletta                                         | 1642           | 1987       |
| 105 | Manx              | Douglas                                          | 1707           | 1835       |
| 106 | Maris             | Yoshkar-Ola                                      | 1767           | 1990       |
| 107 | Megleno-Romanians | Kilkis                                           | 1512           | 1963       |
| 108 | Meskhtekians      | Akhalsikhe                                       |                |            |
| 109 | Moldovans         | Chisinau                                         | 1642           | 1977       |
| 110 | Monegasques       | Monaco-Ville                                     | 1795           |            |

*continued on next page*

*continued from previous page*

|     | name          | homeland city     | printing press | dictionary |
|-----|---------------|-------------------|----------------|------------|
| 111 | Montenegrins  | Podgorica         | 1494           |            |
| 112 | Moravians     | Brno              | 1486           | 1982       |
| 113 | Mordvins      | Saransk           |                | 1973       |
| 114 | Mountain Jews | Majalis, Dagestan |                |            |
| 115 | Nenets        | Naryan-Mar        |                |            |
| 116 | Nogais        | Kizlyar, Dagestan |                |            |
| 117 | Normans       | Rouen             | 1485           |            |
| 118 | Northumbrians | Newcastle         | 1646           |            |
| 119 | Norwegians    | Oslo              | 1643           | 1930       |
| 120 | Occitans      | Toulouse          | 1476           | 1875       |
| 121 | Ossetians     | Vladikavkaz       |                | 1958       |
| 122 | Piedmontese   | Turin             | 1474           | 1983       |
| 123 | Poles         | Warsaw            | 1522           | 1807       |
| 124 | Pomaks        | Edirne            | 1554           |            |
| 125 | Portuguese    | Lisbon            | 1489           | 1852       |
| 126 | Rhinelanders  | Cologne           | 1464           | 1928       |
| 127 | Romands       | Geneva            | 1478           | 1926       |
| 128 | Romanians     | Bucharest         | 1708           | 1907       |
| 129 | Romansh       | Chur              | 1557           | 1939       |
| 130 | Romas         | Soroca            |                |            |
| 131 | Russians      | Moscow            | 1564           | 1891       |
| 132 | Rutuls        | Rutul, Dagestan   |                |            |
| 133 | Samis         | Kautokeino        | 1649           | 1939       |
| 134 | Sanjakis      | Novi Pazar        |                |            |
| 135 | San Marinese  | San Marino        |                |            |
| 136 | Sards         | Cagliari          | 1493           |            |
| 137 | Savoyards     | Chambéry          | 1484           | 1969       |
| 138 | Saxons        | Dresden           | 1524           | 1953       |
| 139 | Scanians      | Malmo             | 1528           |            |
| 140 | Scots         | Edinburgh         | 1508           | 1931       |
| 141 | Serbs         | Belgrade          | 1552           | 1818       |
| 142 | Sicilians     | Palermo           | 1478           | 1977       |
| 143 | Silesians     | Wroclaw           | 1475           | 1962       |
| 144 | Slovaks       | Bratislava        | 1500           | 1959       |
| 145 | Slovenes      | Ljubljana         | 1575           | 1976       |
| 146 | Sorbs         | Bautzen           | 1555           | 1978       |
| 147 | Spaniards     | Madrid            | 1566           | 1886       |
| 148 | Swabians      | Stuttgart         | 1486           | 1901       |
| 149 | Swedes        | Stockholm         | 1483           | 1893       |
| 150 | Swiss-Germans | Zürich            | 1479           | 1881       |

*continued on next page*

*continued from previous page*

|     | name           | homeland city                                 | printing press | dictionary |
|-----|----------------|-----------------------------------------------|----------------|------------|
| 151 | Szeklars       | Cluj-Napoca                                   | 1578           | 1975       |
| 152 | Tabasarans     | Khiv, Dagestan                                |                |            |
| 153 | Talysh         | Astara                                        |                |            |
| 154 | Tats           | Shabran                                       |                |            |
| 155 | Tatars         | Kazan                                         | 1804           | 1969       |
| 156 | Terek Cossacks | Stavropol                                     |                |            |
| 157 | Tindis         | Tindi village, Tsumadinsky district, Dagestan |                |            |
| 158 | Tsakhurs       | Balakan, Dagestan                             |                |            |
| 159 | Turks          | Ankara                                        | 1726           | 1963       |
| 160 | Tyroleans      | Innsbruck                                     | 1547           | 1866       |
| 161 | Udis           | Qabala district                               |                |            |
| 162 | Udmurts        | Izhhevsk                                      |                | 1890       |
| 163 | Ukrainians     | Kiev                                          | 1616           | 1886       |
| 164 | Venetians      | Venice                                        | 1469           | 1829       |
| 165 | Veps           | Sheltozero district                           |                | 1972       |
| 166 | Volga Germans  | Saratov                                       |                | 1974       |
| 167 | Vorarlbergers  | Bregenz                                       | 1658           | 1955       |
| 168 | Waldensians    | Torre Pellice                                 | 1479           | 1973       |
| 169 | Walloons       | Namur                                         |                | 1927       |
| 170 | Welsh          | Cardiff                                       | 1546           | 1887       |
| 171 | Zetlanders     | Lerwick                                       |                |            |

## 2 List of 47 European States in the Data Set

This table provides a list of 47 European states in my dataset, which describes the earliest date of the printing press, the name of the city where the first printing press was set up (whenever the name is available), the language with the largest population, and the date of the vernacular dictionary. The *Language* column denotes the official languages; for countries with multiple official languages, the language with the largest population is listed on the first row and those with fewer populations are on the second row.

The data is sorted by the date of print acquisition.

**Table A2**

|    | country        | printing press | city                    | dictionary | language                                  |
|----|----------------|----------------|-------------------------|------------|-------------------------------------------|
| 1  | Germany        | 1450           | Mainz                   | 1852       | German (standard)                         |
| 2  | Austria        | 1461           | Vienna                  | 1963       | German (regional)                         |
| 3  | Italy          | 1464           | Subiaco                 | 1861       | Italian                                   |
| 4  | Netherlands    | 1465           | Haarlem                 | 1864       | Dutch                                     |
| 5  | France         | 1470           | Paris                   | 1858       | French                                    |
| 6  | Switzerland    | 1470           | Basel, Beromünster      | 1881       | Swiss-German,<br>French, Italian, Romansh |
| 7  | Belgium        | 1473           | Bruges                  | 1927       | French (regional),<br>Dutch               |
| 8  | Hungary        | 1473           | Buda (Budapest)         | 1890       | Hungarian                                 |
| 9  | Spain          | 1473           | Valencia, Barcelona     | 1886       | Spanish                                   |
| 10 | Poland         | 1474           | Kraków (Cracow)         | 1807       | Polish                                    |
| 11 | Czech Republic | 1476           | Plzeň (Pilsen)          | 1935       | Czech                                     |
| 12 | United Kingdom | 1476           | London                  | 1755       | English                                   |
| 13 | Denmark        | 1482           | Odense                  | 1918       | Danish                                    |
| 14 | Croatia        | 1483           | Zagreb                  | 1901       | Croatian                                  |
| 15 | Sweden         | 1483           | Stockholm               | 1893       | Swedish                                   |
| 16 | Portugal       | 1487           | Faro                    | 1852       | Portuguese                                |
| 17 | Turkey         | 1493           | Istanbul                | 1963       | Turkish                                   |
| 18 | Montenegro     | 1494           | Podgorica               |            | Montenegrin                               |
| 19 | Slovakia       | 1500           | Bratislava              | 1959       | Slovak                                    |
| 20 | Romania        | 1508           | Târgoviște              | 1907       | Romanian (standard)                       |
| 21 | Armenia        | 1512           | Yerevan                 | 1971       | Armenian                                  |
| 22 | Greece         | 1512           | Salonica (Thessaloniki) | 1936       | Greek                                     |
| 23 | Belarus        | 1520           |                         | 1977       | Belarusian,<br>Russian                    |
| 24 | Lithuania      | 1525           | Vilnius                 | 1956       | Lithuanian                                |
| 25 | Iceland        | 1530           | Hollar                  | 1912       | Icelandic                                 |

*continued on next page*

*continued from previous page*

|    | name                   | printing press | city        | dictionary | language                        |
|----|------------------------|----------------|-------------|------------|---------------------------------|
| 26 | Bosnia and Herzegovina | 1531           | Goražde     | 1992       | Bosnian                         |
| 27 | Ireland                | 1550           | Dublin      | 1913       | Irish,<br>English               |
| 28 | Serbia                 | 1552           | Belgrade    | 1818       | Serbian                         |
| 29 | Albania                | 1555           | Tirana      | 1980       | Albanian                        |
| 30 | Russia                 | 1564           | Moscow      | 1891       | Russian                         |
| 31 | Ukraine                | 1574           | Lviv (Lvov) | 1886       | Ukrainian                       |
| 32 | Slovenia               | 1575           | Ljubljana   | 1976       | Slovene                         |
| 33 | Latvia                 | 1587           | Riga        | 1972       | Latvian                         |
| 34 | Luxembourg             | 1598           | Luxembourg  | 1950       | Luxemburgish,<br>French, German |
| 35 | Estonia                | 1630           | Tallinn     | 1918       | Estonian                        |
| 36 | Finland                | 1642           | Turku       | 1953       | Finnish,<br>Swedish             |
| 37 | Malta                  | 1642           |             | 1987       | Maltese                         |
| 38 | Moldova                | 1642           | Iași        | 1977       | Romanian (regional)             |
| 39 | Norway                 | 1643           | Olso        | 1930       | Norwegian                       |
| 40 | Georgia                | 1709           | Tbilisi     | 1884       | Georgian                        |
| 41 | Monaco                 | 1795           |             |            | Monégasque                      |
| 42 | Bulgaria               | 1828           | Samokov     | 1895       | Bulgarian                       |
| 43 | Macedonia              | 1840           |             | 1961       | Macedonian                      |
| 44 | Azerbaijan             | 1870           | Baku        | 1966       | Azeri                           |
| 45 | Andorra                |                |             |            |                                 |
| 46 | San Marino             |                |             |            |                                 |
| 47 | Liechtenstein          |                |             |            |                                 |



### 3 Regression Tables

#### 3.1 Cox proportional hazards and logistic regression models used in paper

Table A3 reports the complete regression estimates of Table 3 of the main body.

**Table A3: Regression outputs of the printing press' impact on language standardization.**

| model                             | bivariate           |                     | demand side           |                      | supply side           |                      | fully specified       |                      |
|-----------------------------------|---------------------|---------------------|-----------------------|----------------------|-----------------------|----------------------|-----------------------|----------------------|
|                                   | Cox<br>(1)          | logit<br>(2)        | Cox<br>(3)            | logit<br>(4)         | Cox<br>(5)            | logit<br>(6)         | Cox<br>(7)            | logit<br>(8)         |
| Printing press                    | 2.159***<br>(0.269) | 2.933***<br>(0.342) | 1.600***<br>(0.356)   | 2.178***<br>(0.456)  | 1.455***<br>(0.354)   | 1.932***<br>(0.503)  | 1.450***<br>(0.339)   | 2.083***<br>(0.556)  |
| University                        |                     |                     | 0.0004***<br>(0.0001) | 0.001***<br>(0.0002) | 0.0004***<br>(0.0001) | 0.001***<br>(0.0003) | 0.0004***<br>(0.0001) | 0.001***<br>(0.0002) |
| Bishop                            |                     |                     | -0.000002<br>(0.0001) | -0.0001<br>(0.0002)  | 0.00003<br>(0.0001)   | 0.00004<br>(0.0002)  | -0.00002<br>(0.0001)  | -0.00002<br>(0.0003) |
| Log urban potential               |                     |                     | 0.114<br>(0.226)      | 0.098<br>(0.365)     | -0.002<br>(0.607)     | -0.307<br>(0.793)    | 0.186<br>(0.636)      | -0.276<br>(0.821)    |
| Log distance to Wittenberg/Zürich |                     |                     |                       |                      | 0.0001<br>(0.0003)    | -0.0001<br>(0.001)   | 0.0004<br>(0.0003)    | 0.0002<br>(0.001)    |
| War frequency                     |                     |                     |                       |                      | -0.031**<br>(0.014)   | -0.043***<br>(0.016) | -0.030**<br>(0.013)   | -0.048***<br>(0.018) |
| Elevation                         |                     |                     |                       |                      | -0.0001<br>(0.0004)   | -0.00002<br>(0.001)  | 0.0001<br>(0.0004)    | 0.0005<br>(0.001)    |
| Terrain ruggedness                |                     |                     |                       |                      | -0.003**<br>(0.001)   | -0.004**<br>(0.002)  | -0.002**<br>(0.001)   | -0.004**<br>(0.002)  |
| Hub Roman road                    |                     |                     |                       |                      | 0.156<br>(0.296)      | 0.494<br>(0.634)     | 0.129<br>(0.337)      | 0.431<br>(0.7)       |
| Roman road                        |                     |                     |                       |                      | -0.009<br>(0.247)     | -0.023<br>(0.467)    | 0.081<br>(0.304)      | 0.151<br>(0.603)     |
| Oceanic port                      |                     |                     |                       |                      | -0.415**<br>(0.212)   | -0.712*<br>(0.411)   | -0.477*<br>(0.26)     | -0.721<br>(0.539)    |
| Island                            |                     |                     |                       |                      | -0.057<br>(0.475)     | 0.185<br>(0.85)      | -0.038<br>(0.52)      | 0.2<br>(0.965)       |
| Ottoman Empire                    |                     |                     |                       |                      |                       |                      | -0.621<br>(0.812)     | -0.822<br>(0.959)    |
| Russian Empire                    |                     |                     |                       |                      |                       |                      | 0.243<br>(0.237)      | 0.354<br>(0.473)     |
| Habsburg Empire                   |                     |                     |                       |                      |                       |                      | -0.075<br>(0.33)      | -0.252<br>(0.704)    |
| Orthodox                          |                     |                     |                       |                      |                       |                      | 0.279<br>(0.284)      | 0.725<br>(0.614)     |
| Protestant                        |                     |                     |                       |                      |                       |                      | 0.383<br>(0.235)      | 0.613<br>(0.474)     |
| Islam                             |                     |                     |                       |                      |                       |                      | -0.939**<br>(0.446)   | -1.072<br>(0.694)    |

*continued on next page*

continued from previous page

| model           | bivariate  |                       | demand side |                       | supply side |                       | fully specified   |                       |
|-----------------|------------|-----------------------|-------------|-----------------------|-------------|-----------------------|-------------------|-----------------------|
|                 | Cox<br>(1) | logit<br>(2)          | Cox<br>(3)  | logit<br>(4)          | Cox<br>(5)  | logit<br>(6)          | Cox<br>(7)        | logit<br>(8)          |
| Northern Europe |            |                       |             |                       |             |                       | -0.246<br>(0.35)  | -0.371<br>(0.719)     |
| Southern Europe |            |                       |             |                       |             |                       | 0.017<br>(0.317)  | -0.264<br>(0.695)     |
| Eastern Europe  |            |                       |             |                       |             |                       | -0.194<br>(0.363) | -0.39<br>(0.768)      |
| Western Asia    |            |                       |             |                       |             |                       | -0.621<br>(0.595) | -1.207<br>(1.043)     |
| $t$             |            | 0.024<br>(0.017)      |             | 0.021<br>(0.017)      |             | 0.04<br>(0.029)       |                   | 0.04<br>(0.029)       |
| $t^2$           |            | 0.00001<br>(0.00002)  |             | 0.00001<br>(0.00002)  |             | -0.00001<br>(0.00004) |                   | -0.00001<br>(0.00004) |
| Intercept       |            | -16.151***<br>(3.697) |             | -16.159***<br>(3.767) |             | -19.244***<br>(6.554) |                   | -19.811***<br>(6.452) |
| AIC             | 1664.72    | 516.44                | 1650.75     | 494.78                | 1645.65     | 484.26                | 1645.01           | 480.83                |
| Observations    | 2,052      | 2,052                 | 2,052       | 2,052                 | 2,052       | 2,052                 | 2,052             | 2,052                 |

Note: Robust standard errors clustered by ethnic groups for all models. *Western Europe* is used as the reference category for region fixed effects and thus omitted. *Catholic* is used as the reference category for religion fixed effects and thus omitted. \*\*\* denote  $p < 0.01$ , \*\*  $p < 0.05$ , and \*  $p < 0.1$ .

## 3.2 Robustness checks I: state as the unit of analysis

### 3.2.1 State-only sample

Table A4 reports the complete output of the abridged Cox proportional hazards models shown in Table 4 of the main body. In this series of robustness checks, I use states as the unit of analysis. “List” refers to a set of alternative dates of dictionary publications for countries with multiple official languages in the dependent variable.

**Table A4: Cox proportional hazards model outputs of the printing press’ impact on language standardization.**

| model                             | List 1<br>(1)         | List 2<br>(2)       | List 3<br>(3)         | List 4<br>(4)         |
|-----------------------------------|-----------------------|---------------------|-----------------------|-----------------------|
| Printing press                    | 14.711***<br>(0.98)   | 14.984***<br>(0.92) | 14.725***<br>(1.1)    | 14.814***<br>(0.97)   |
| First year of printing press      | -0.002<br>(0.001)     | -0.001<br>(0.001)   | -0.002*<br>(0.001)    | -0.002<br>(0.001)     |
| University                        | 0.0002<br>(0.0002)    | 0.0003<br>(0.0002)  | 0.0001<br>(0.0002)    | 0.0002<br>(0.0002)    |
| Bishop                            | -0.0003**<br>(0.0002) | -0.0002<br>(0.0002) | -0.0001<br>(0.0002)   | -0.0002<br>(0.0002)   |
| Log urban potential               | 0.932<br>(0.595)      | 1.335**<br>(0.532)  | 1.254**<br>(0.58)     | 0.937<br>(0.62)       |
| Log distance to Wittenberg/Zürich | 0.0007*<br>(0.0004)   | 0.001*<br>(0.0003)  | 0.001**<br>(0.0004)   | 0.001*<br>(0.0004)    |
| War frequency                     | -0.003<br>(0.013)     | -0.001<br>(0.012)   | -0.002<br>(0.013)     | -0.006<br>(0.013)     |
| Elevation                         | -0.002***<br>(0.0005) | -0.001<br>(0.0006)  | -0.002***<br>(0.0005) | -0.002***<br>(0.0005) |
| Terrain ruggedness                | -0.005*<br>(0.003)    | -0.006**<br>(0.003) | -0.005*<br>(0.003)    | -0.005*<br>(0.003)    |
| Hub Roman road                    | 0.336<br>(0.364)      | 0.468<br>(0.399)    | 0.547<br>(0.427)      | 0.462<br>(0.377)      |
| Roman road                        | 0.402<br>(0.324)      | -0.028<br>(0.338)   | 0.234<br>(0.38)       | 0.378<br>(0.324)      |
| Oceanic port                      | -0.8**<br>(0.337)     | -0.59*<br>(0.351)   | -0.886***<br>(0.344)  | -0.805***<br>(0.336)  |
| Island                            | 0.115<br>(0.258)      | 0.268<br>(0.271)    | 0.160<br>(0.262)      | 0.118<br>(0.25)       |

*continued on next page*

continued from previous page

| model           | List 1<br>(1)       | List 2<br>(2)       | List 3<br>(3)       | List 4<br>(4)       |
|-----------------|---------------------|---------------------|---------------------|---------------------|
| Ottoman Empire  | -1.822*<br>(1.1)    | -2.127**<br>(1.06)  | -1.949*<br>(1.09)   | -1.702<br>(1.1)     |
| Russian Empire  | -0.244<br>(0.289)   | -0.054<br>(0.251)   | -0.225<br>(0.295)   | -0.216<br>(0.298)   |
| Habsburg Empire | -0.642<br>(0.441)   | -0.925**<br>(0.455) | -0.863*<br>(0.503)  | -0.641<br>(0.45)    |
| Orthodox        | -0.095<br>(0.462)   | 0.0002<br>(0.453)   | -0.164<br>(0.535)   | -0.092<br>(0.472)   |
| Protestant      | 1.250***<br>(0.303) | 0.268<br>(0.31)     | 0.885***<br>(0.316) | 1.136***<br>(0.317) |
| Islam           | -0.371<br>(1.163)   | -0.267<br>(0.948)   | 0.020<br>(1.051)    | -0.389<br>(1.173)   |
| Northern Europe | -0.378<br>(0.303)   | 0.110<br>(0.311)    | -0.343<br>(0.312)   | -0.259<br>(0.307)   |
| Southern Europe | 0.685*<br>(0.359)   | 0.537<br>(0.395)    | 0.629<br>(0.4)      | 0.780**<br>(0.374)  |
| Eastern Europe  | 1.105**<br>(0.5)    | 0.640<br>(0.526)    | 0.758<br>(0.593)    | 1.074**<br>(0.513)  |
| Western Asia    | 1.592*<br>(0.963)   | 0.757<br>(0.965)    | 1.076<br>(0.958)    | 1.646*<br>(0.94)    |
| AIC             | 538.29              | 596.87              | 558.7               | 533.87              |
| Observations    | 564                 | 564                 | 564                 | 564                 |

Note: Robust standard errors clustered by country for all models. *Western Europe* and *Catholic* are used as the reference category, respectively, for geographic region fixed effects and for religion fixed effects so they are omitted. \*\*\* denote  $p < 0.01$ , \*\*  $p < 0.05$ , and \*  $p < 0.1$ .

### 3.2.2 Stateless ethnic groups-only sample

Table A5 documents Cox regression estimates using stateless ethnic groups (n = 124). This is reported in Column 5 of Table 4 in the main body.

**Table A5: Regression outputs of the printing press' impact on language standardization.**

| model                             | Cox<br>(1)            |
|-----------------------------------|-----------------------|
| Printing press                    | 4.915**<br>(2.293)    |
| Print year                        | -0.002*<br>(0.001)    |
| University                        | 0.0002<br>(0.0002)    |
| Bishop                            | -0.00005<br>(0.0002)  |
| Log urban potential               | 0.700<br>(0.967)      |
| Log distance to Wittenberg/Zürich | 0.001<br>(0.0005)     |
| War frequency                     | -0.032<br>(0.02)      |
| Elevation                         | 0.0005<br>(0.0006)    |
| Terrain ruggedness                | -0.004**<br>(0.002)   |
| Hub Roman road                    | -0.254<br>(0.396)     |
| Roman road                        | 0.021<br>(0.369)      |
| Oceanic port                      | -0.434<br>(0.395)     |
| Island                            | -0.438<br>(0.966)     |
| Ottoman Empire                    | -15.591***<br>(0.875) |
| Russian Empire                    | 0.979***<br>(0.297)   |
| Habsburg Empire                   | 0.543<br>(0.571)      |

*continued on next page*

*continued from previous page*

| model           | Cox<br>(1)           |
|-----------------|----------------------|
| Orthodox        | 0.202<br>(0.403)     |
| Protestant      | 0.469<br>(0.297)     |
| Islam           | -1.295**<br>(0.571)  |
| Northern Europe | -0.413<br>(0.537)    |
| Southern Europe | 0.136<br>(0.48)      |
| Eastern Europe  | -1.079***<br>(0.412) |
| Western Asia    | -2.881**<br>(1.328)  |
| AIC             | 815.41               |
| Observations    | 1,488                |

Note: Robust standard errors clustered by country for all models. *Western Europe* and *Catholic* are used as the reference category, respectively, for geographic region fixed effects and for religion fixed effects and are omitted. \*\*\* denote  $p < 0.01$ , \*\*  $p < 0.05$ , and \*  $p < 0.1$ .

### 3.3 Robustness checks II: The role of human capital

Table A6 documents the full regression estimates of Table 5 of the main body.

**Table A6: Regression outputs of the printing press' impact on language standardization.**

| model                             | Cox<br>(1)            | logit<br>(2)         | Cox<br>(3)           | logit<br>(4)         |
|-----------------------------------|-----------------------|----------------------|----------------------|----------------------|
| Printing press                    |                       |                      | 1.394***<br>(0.342)  | 2.023***<br>(0.558)  |
| Vernacular Bible                  | 0.531**<br>(0.251)    | 0.745**<br>(0.356)   | 0.461*<br>(0.257)    | 0.676*<br>(0.365)    |
| University                        | 0.0005***<br>(0.0001) | 0.001***<br>(0.0002) | 0.0003**<br>(0.0001) | 0.001***<br>(0.0003) |
| Bishop                            | 0.00006<br>(0.0001)   | 0.0001<br>(0.0003)   | -0.00004<br>(0.0001) | -0.0001<br>(0.0003)  |
| Log urban potential               | -0.157<br>(0.613)     | -0.554<br>(0.805)    | 0.168<br>(0.616)     | -0.259<br>(0.818)    |
| Log distance to Wittenberg/Zürich | -0.0001<br>(0.0003)   | -0.0004<br>(0.001)   | 0.0004<br>(0.0003)   | 0.0002<br>(0.001)    |
| War frequency                     | -0.026**<br>(0.013)   | -0.038**<br>(0.016)  | -0.03**<br>(0.013)   | -0.048***<br>(0.018) |
| Elevation                         | 0.0003<br>(0.0004)    | 0.001<br>(0.001)     | 0.0002<br>(0.0004)   | 0.001<br>(0.001)     |
| Terrain ruggedness                | -0.003***<br>(0.001)  | -0.005**<br>(0.002)  | -0.003**<br>(0.001)  | -0.004**<br>(0.002)  |
| Hub Roman road                    | 0.217<br>(0.341)      | 0.531<br>(0.693)     | 0.054<br>(0.336)     | 0.267<br>(0.712)     |
| Roman road                        | 0.007<br>(0.29)       | 0.082<br>(0.582)     | 0.107<br>(0.31)      | 0.252<br>(0.62)      |
| Oceanic port                      | -0.213<br>(0.252)     | -0.317<br>(0.487)    | -0.436*<br>(0.263)   | -0.658<br>(0.541)    |
| Island                            | -0.36<br>(0.507)      | -0.374<br>(0.888)    | -0.115<br>(0.511)    | 0.063<br>(0.949)     |
| Ottoman Empire                    | -0.666<br>(0.792)     | -0.914<br>(0.907)    | -0.589<br>(0.792)    | -0.834<br>(0.892)    |
| Russian Empire                    | 0.018<br>(0.252)      | -0.046<br>(0.491)    | 0.173<br>(0.235)     | 0.244<br>(0.472)     |
| Habsburg Empire                   | 0.075<br>(0.341)      | 0.007<br>(0.646)     | -0.088<br>(0.337)    | -0.265<br>(0.7)      |

*continued on next page*

continued from previous page

| model           | Cox<br>(1)          | logit<br>(2)          | Cox<br>(3)         | logit<br>(4)          |
|-----------------|---------------------|-----------------------|--------------------|-----------------------|
| Orthodox        | 0.467<br>(0.291)    | 0.963<br>(0.588)      | 0.286<br>(0.286)   | 0.786<br>(0.602)      |
| Protestant      | 0.337<br>(0.248)    | 0.561<br>(0.494)      | 0.345<br>(0.236)   | 0.527<br>(0.482)      |
| Islam           | -0.913**<br>(0.454) | -1.031<br>(0.661)     | -0.870*<br>(0.448) | -1.016<br>(0.679)     |
| Northern Europe | -0.179<br>(0.346)   | -0.259<br>(0.699)     | -0.188<br>(0.347)  | -0.304<br>(0.717)     |
| Southern Europe | 0.006<br>(0.314)    | -0.271<br>(0.700)     | 0.001<br>(0.313)   | -0.363<br>(0.72)      |
| Eastern Europe  | -0.190<br>(0.376)   | -0.343<br>(0.747)     | -0.102<br>(0.371)  | -0.281<br>(0.753)     |
| Western Asia    | -0.374<br>(0.658)   | -0.763<br>(1.025)     | -0.650<br>(0.594)  | -1.296<br>(1.039)     |
| $t$             |                     | 0.044<br>(0.03)       |                    | 0.041<br>(0.029)      |
| $t^2$           |                     | -0.00001<br>(0.00004) |                    | -0.00001<br>(0.00004) |
| Intercept       |                     | -19.325***<br>(6.777) |                    | -20.064***<br>(6.476) |
| AIC             | 1660.38             | 495.57                | 1642.95            | 478.43                |
| Observations    | 2,052               | 2,052                 | 2,052              | 2,052                 |

Note: Robust standard errors clustered by ethnic groups for all models. *Western Europe* is used as the reference category for region fixed effects and thus omitted. *Catholic* is used as the reference category for religion fixed effects and thus omitted. \*\*\* denote  $p < 0.01$ , \*\*  $p < 0.05$ , and \*  $p < 0.1$ .



### 3.4 Instrumental variables (IV) approach: Distance from Mainz as IV

Table A7 reports the full regression estimates of Table 6 of the paper.

**Table A7: IV probit regression outputs of the printing press' impact on language standardization.**

| dependent variable<br>N cumulative dictionary | First stage            | Second stage             |                          |                          |                           |
|-----------------------------------------------|------------------------|--------------------------|--------------------------|--------------------------|---------------------------|
|                                               | printing press<br>(1)  | language standardization |                          |                          |                           |
|                                               |                        | by 1850<br>n = 7<br>(2)  | by 1900<br>n = 27<br>(3) | by 1950<br>n = 48<br>(4) | by 2000<br>n = 104<br>(5) |
| Log distance to Mainz                         | -0.159***<br>(0.060)   |                          |                          |                          |                           |
| Printing press                                |                        | 11.822<br>(37.038)       | 4.639<br>(3.051)         | 4.741**<br>(2.284)       | 4.018**<br>(1.828)        |
| Print adoption year                           | 0.0003***<br>(0.00004) | 0.001<br>(0.006)         | -0.001<br>(0.001)        | -0.001<br>(0.001)        | -0.0004<br>(0.001)        |
| University                                    | 0.0001***<br>(0.00003) | 0.0001<br>(0.005)        | 0.0002<br>(0.0003)       | 0.0001<br>(0.0003)       | 0.0002<br>(0.0002)        |
| Bishop                                        | 0.00001<br>(0.00003)   | -0.001<br>(0.004)        | -0.0001<br>(0.0002)      | -0.0002<br>(0.0002)      | -0.00003<br>(0.0001)      |
| Log urban potential                           | -0.004<br>(0.073)      | 7.111**<br>(3.010)       | 2.221***<br>(0.217)      | 1.280***<br>(0.099)      | 1.275***<br>(0.074)       |
| Log distance to Wittenberg/Zürich             |                        | -0.005<br>(0.005)        | 0.001**<br>(0.001)       | 0.001***<br>(0.0003)     | 0.001***<br>(0.0003)      |
| War frequency                                 | -0.002<br>(0.003)      | 0.007<br>(0.092)         | -0.011<br>(0.022)        | -0.022*<br>(0.013)       | -0.025***<br>(0.009)      |
| Elevation                                     | 0.0001**<br>(0.00003)  | 0.005<br>(0.011)         | -0.0002<br>(0.001)       | -0.0004<br>(0.001)       | -0.0001<br>(0.0004)       |
| Terrain ruggedness                            | -0.0002**<br>(0.0001)  | -0.044<br>(0.070)        | -0.002<br>(0.003)        | -0.001<br>(0.002)        | -0.001<br>(0.001)         |
| Hub Roman road                                | 0.131**<br>(0.052)     | -6.338<br>(4.421)        | -0.458<br>(0.596)        | -0.480<br>(0.456)        | -0.315<br>(0.390)         |
| Roman road                                    | -0.008<br>(0.040)      | 1.358<br>(3.645)         | 0.473<br>(0.576)         | 0.268<br>(0.449)         | 0.141<br>(0.349)          |
| Oceanic port                                  | 0.041<br>(0.043)       | 0.444<br>(3.262)         | -0.380<br>(0.459)        | -0.527<br>(0.366)        | -0.538*<br>(0.286)        |
| Island                                        | -0.005<br>(0.053)      | 6.790***<br>(2.019)      | 1.158**<br>(0.502)       | 0.452<br>(0.429)         | 0.392<br>(0.417)          |

*continued on next page*

continued from previous page

| dependent variable<br>N cumulative dictionary | First stage          | Second stage             |                      |                      |                      |
|-----------------------------------------------|----------------------|--------------------------|----------------------|----------------------|----------------------|
|                                               | printing press       | language standardization |                      |                      |                      |
|                                               |                      | by 1850<br>n = 7         | by 1900<br>n = 27    | by 1950<br>n = 48    | by 2000<br>n = 104   |
|                                               | (1)                  | (2)                      | (3)                  | (4)                  | (5)                  |
| Ottoman Empire                                | -0.049<br>(0.045)    | 4.178**<br>(1.643)       | -0.220<br>(0.611)    | -0.151<br>(0.480)    | -0.322<br>(0.467)    |
| Russian Empire                                | 0.020<br>(0.026)     | -2.738***<br>(0.766)     | 0.253<br>(0.526)     | 0.262<br>(0.351)     | 0.320<br>(0.275)     |
| Habsburg Empire                               | 0.118**<br>(0.046)   | -3.027**<br>(1.300)      | -0.673<br>(0.777)    | -0.668<br>(0.596)    | -0.590<br>(0.445)    |
| Orthodox                                      | -0.144**<br>(0.060)  | 2.110<br>(3.658)         | 0.865<br>(0.594)     | 0.544<br>(0.452)     | 0.526<br>(0.352)     |
| Catholic/Protestant                           | -0.213***<br>(0.043) | -0.390<br>(5.030)        | -0.390<br>(0.697)    | -0.454<br>(0.468)    | -0.269<br>(0.372)    |
| Islam                                         | -0.124**<br>(0.056)  | 0.158<br>(4.829)         | -4.899***<br>(0.984) | -5.652***<br>(0.609) | -0.680*<br>(0.386)   |
| Northern Europe                               | -0.001<br>(0.062)    | 6.131***<br>(1.878)      | 0.020<br>(0.480)     | 0.270<br>(0.400)     | 0.109<br>(0.387)     |
| Southern Europe                               | 0.156**<br>(0.067)   | 5.603***<br>(2.136)      | 0.102<br>(0.549)     | -0.297<br>(0.395)    | -0.058<br>(0.315)    |
| Eastern Europe                                | 0.060<br>(0.070)     | 9.491**<br>(4.449)       | 0.614<br>(0.846)     | 0.044<br>(0.591)     | 0.017<br>(0.444)     |
| Western Asia                                  | 0.071<br>(0.078)     | 11.974*<br>(6.995)       | 1.308<br>(1.532)     | 0.198<br>(1.097)     | -0.566<br>(0.622)    |
| Intercept                                     | 1.28***<br>(0.413)   | -28.929<br>(18.163)      | -9.522***<br>(1.138) | -6.967***<br>(0.749) | -6.992***<br>(0.598) |
| Observations                                  | 2,052                | 1,539                    | 1,710                | 1,881                | 2,052                |
| p-value, Wald exogeneity test                 |                      | 0.75                     | 0.12                 | 0.038*               | 0.028*               |
| F-statistic on weak instrument                | 24.99                |                          |                      |                      |                      |

Note: Robust standard errors clustered by ethnic groups. IV probit estimation: first stage is OLS, second stage is probit, regressed on predicted values from the first stage. In the first stage, *log urban potential* and *war frequency* are for the fourteenth centuries. *Western Europe* is used as the reference category for region fixed effects and thus omitted. In the second stage, *Catholic* is used as the reference category for religion fixed effects and thus omitted. \*\*\* denote  $p < 0.01$ , \*\*  $p < 0.05$ , and \*  $p < 0.1$ .
